# Supplementary material for: Functional Analysis of a Multiple-Domain CTL15 in the Innate Immunity, Eclosion, and Reproduction of Tribolium castaneum
Source: MDPI journal article supplement (doi:10.3390/cells12040608), 2023-02-13
Supplement: s1 [file s1]

## Supplemental figures and tables

```

1  ATGTGGTCAATGAAATGTCAGCCAGGAGGCTCCATTAGTGTGTTAGTGATCTGTGTTGGAATTATCAACTTCAGGAACGTGCAAGAAATCAAAATGTGGGCATCTGCCATTCCCTTG
1  M W S M K C Q P R R P P F S Y L V L I L F G L F N F R N C Q E I K C G H P A I P L
121  AAGGCCAGGGCTCCCTGAGCTCTCCCGAGCTGCTCCGGGAACCGTGCCAAATACCACTGCGATGAGGATATGAGAGCTTGGTAACACGGAACTTCGTGTTGCCGCTGGAAAA
41  N A H V S L S S P G L A P G T V A K Y Q C D E G Y E T F G N T E T S C S P A G K
241  TGGATCGGCGAGTTGCCGTTTGTGGCAACACATCGCTTACCGCAACCCGCCAACCAATCAACACCGCTTCGGGGGGGCGGCCCTGAAAGCCACGACGGGAAAAAGCACCGAA
81  W I G E L P F C G T N I A Y R K P A N Q S T T V R G G S A L N A N D G E K S T E
361  CAGCAGGAAAACTGCTCGAGACCCAGAGGAGGCCACCGCTGGTGCGAGTGGACCTCTCCAGCCCTACCCCGTGAAGGTGGTGGGGTGACCAAGGGGCTGCTGGCCGAC
121  H D G K R C S E T Q K E A S P N W H V D L L Q P Y P V K V V R V T T R G C C G H
481  CAGCCCTCCAGAACCTGGAGATCCGGTGGGAACAGCAGCAGTGAACCTCTCTGCGCTGGTTCCGGGAAACATAGACGAAGGGTAAAGGAAGCATTCACTGT
161  Q P L Q D L E I R V G N S S T D L Q R N P L C A W P P G T I D E G V T K T F T C
601  GCACGAGTTTAAACGACAAATACGTTTCTGTCAGCTGGTGGAGTGGAGGGTCTGTGTCGCTCTGCAAGTGGAGGTTTCAACACGGACGAGTTTCCGTGATCGTGGCCCG
201  A R V L T G Q Y Y F L Q L V G V E G S L S L C E V E V F T T D E F S Y D H E A F
721  AGGGGGGCGCTGAGAGCTGCACTTGGCGTCTTGGCCGCACTTGTACAGAGTTCGGGGTAGCGCGAGGGTGGTCCAGGAAGCGCAATTACTGCAGGAGCCATAAGCGGAC
241  R G A P E D V Q L A S F A R T C Y E F G V S R G G S F Q E A R N Y C R S H N G D
841  CTGGTGCACGGCATGAGCGAGCTGCACAGCGTTTCTTATGCGGAACCTGAGAGGGGGAAGCGGATGCTGAAGACACAACTGGTTGGATCGGTGCCAAAAAGAGCCAGGAATCAG
281  L V H G M S A A A T T F L Y A E L E R R K P M L R T Q L V W I G A Q K E P G I T
961  TCGAGGGTCTGGAAATGGTTAATGGGACTTGGTCCAGCGTCCAGCTGGGGAAAGACCAACCAACAATTATAACGGTGAACAAACTGGTAGTCTCGACGGTGGAGCGGGTGG
321  S R V W K W Y N G D L V Q R P A W G K D Q P N N Y N G E Q N C V V L D G G R G W
1081  TTATGGAATGATGATGATGCAATCTGGACTATCTACCATGGATCTGTCAACACTCTCCATGCTCATGCGGAGTCCCGACAACAAATTAACACCACCAATAAAGGAGCAATACAAAC
361  L F N D V G C N L D Y L P W I C Q H S P S S C G S P D K Q I N T T I K G S N Y N
1201  GTGGCTGAGAGATGAATACCAATGTCGAGAGGGGACATGTTGGTGGTGCGAGCAGCACTTTCGGAAGGAAGGTTCCTGGTGGGGAAGCGCAACGTGCAAAATATGTGAGC
401  V G S R I E Y Q C P E G H M L V G E A T R L C G K E G F W S G K A P T C K Y V S
1321  TGTGAGGCTTTGGCGGCTTGAACATGGTCCGTGGTCTAAAGGATAACCGAGCAGATATGGGGCACAGGCTCTTACACCTGTCAAGAAAATTACACTCTTATAGGGCAGGAAATA
441  C E A L P G L E H G S Y V L K D K R T T Y G A Q A L Y T C H E N Y T L I G H E I
1441  CGGACTTGTGGCTCTAATGGGACTTGGAGAAATCCACGCTAAATGCTCTCTCGAGTGGTTCAGATCCACCTAGTATTATGGGGGAGTTGTTAAAGCTCGGGGCGAAGGCTGGA
481  R T C G S N G T W T N S T P K C L F D W C P D P P S I N G G I V K T S G R R A G
1561  GACACCGCGGTTATTCGTGGCAGTCTGGGTTTATCTTGTGCGCAAGGGGTGCTTGTGGGAAGTGGGGGCGAGTGGTGGGCAAGGCCCTCTGTGCAATTCGTGGACTGTGG
521  D T A V T S C Q S G F I L F G Q G V L S C E L G G Q W S G K A P S C K P V D C G
1681  GCGCTCCAAATATGCAATGGCGGTACGACCTGTCTAATGGTACCAACCGTGGAAAGTTGGTGAATACAGCTGTGCCATGACTACTGGCTGAAGGGGAAAAAGTGCAAAA
561  A P P N I D N G R Y D L L N G T T T V E S L V E Y S C G H D Y W L E G Q K V Q K
1801  TGCACAGGGGAGGCAATGTCAGCGGAGCGACCCCTCATGTGACTGATAAGTGGAGGAACCGAGCTTCTGCAAGAGTTACGTGGTGGGTAGCATTTAAAGTACATCTCTC
601  C T R E G K W S A D A P S C E L I T C E E P D V P A G S Y V V G Y D F N V H S S
1921  ATTGAGTACCAGTGGAGGTGGGACATGTGTTGGAGGGGACCCATCCATAGCTGTGCAAGGAAGGGGAGTGGTCTGGTACCCTCAACTTGTGAATTGCTGTGATTGTGGTAAAGTA
641  I E Y H C E V G H V L R G E P I H T C T K E G D W S G T T P T C E F Y D C G K V
2041  CGACCATGCTGACGCTACTGTTAATATATTAATGATACTAGTACCTTGACAGTCAAAATGAGTATTGCTGTGTAAGAAATACAGGCTTAATGGGTTTCAAGGAGGCGCTGTTTG
681  P T M L Y G T Y N Y I N D T T Y L D S Q I E Y S C A K N Y R L N G V S R R R C L
2161  GAAACACAGCAGTGGAGCAATCTCCACCAAGGTGGGAAGATAGATGTCTGAGCAATTTTGGCGAATACATAGCATACTTTCAGTGACTGGGAAGATCGCATGTACGCTGACT
721  E N K Q W S N T P P K C E E I R C P E P I L A E H S I L S V T G N D R M Y G R T
2281  CTTATCAGGACAGCTGAATCTCTCTCACTACTTACAAAAATCGGGCCATAGTCAAAATACAGGTGTGAAGAGGGTACAAAGTTGTGGGCGAGCTTTGAGCACTTGTGAAGATACGGT
761  L I H T A E S S S T T Y K I G A I V K Y R C E R G Y K V V G E P L S T C E D T G
2401  CAGTGGAGTGGCAGTGTCTCAATGGCTCTTGTGGATTGTGGTAACCGGAAATATCCAAACGGTAAAGTTAOCCTTAACCTGAGAGCAAGTACTATGGAGCACTGGCCCTTAC
801  Q W S G D V P Q C V F Y D C G N P E N I Q N G K V T L T S N A T Y Y G A L A L Y
2521  TCTCGGACAAAACCTTCGAAGTGGATGGATTTCAGCGGATTTGTGCTTGAATGGTACTGAGGCTCGAGGCTCCACATGTCGGGAATCCAGTGAAGGAACCCGACAGTTT
841  S C D K N F E L D G V S R R L C L E N G T W S S D A P T C R G I Q C K E P D H F
2641  GACGGAATGACGGTCAAGTTAGTACTTACAGTGTGGGGAGTTGTTGCCATTATCAGTCCCGTGGGCAGCACCATGAGGGGAATGCAACTAGAGTGTGCTGCTGAAGGGGTTTGG
881  D G M T V K V S T Y S V G G V V A Y S C P R G H T M Q G N A T R V C L L K G V W
2761  AGCGGAGGGGCGCCACTTGCACCGCGGTCGATTGTAACACCTTGTACTATCGAAATGGGGAGTGATTGTGATGAATGTAACCTATAATGCGGGATTGAGTACCATTTGTGTC
921  S G R A P T C T A V D C K H P G T I E N G R V I Y M N G T T Y N A A I E Y H C V
2881  CCAAAATTCGAAAGAGTGGGCGGCTATTTCGGAAATGTATGGAGAATGGGAATGTCGGGTGAGGTACACGATGTGAGGAGATTACCGGGGAACACAGGAACCTCGAGTCTGGG
961  P N F E R V G P Y L R K C M E N G E W S G E V P R C E E I T G E P Q E P S S L G
3001  ACCAATATTGGAATTGGGGCGGAGTGTGCTTTTGTCTAATTCCTTATTAGTAATTTATCTTAAATTCGTAAGCCAAATCCAGTGAAGAACCCGAGAAAGTGAAGCGCGGAG
1001  T N I G I G A G V V V F L L I L L V I Y L K L R K P I P V K N T E N Y E G A E
3121  CGCAAGAGACCGAAAGCGCGAGTATGATGATGACCGCACTCTGAGTGACGGAAGCGTCACTTGCACCAATATCTACGAAACATTCAGATGAAACATGTAGATGCCCTAT
1041  R K E D R N A A Y M S Y A T L S D R N G H L P P N I Y E N I H D E N M Y D A P Y
3241  GAGGAGACAAGTCGGCAGTGGCACTTACGAGCCGAAACCAATTCGTGGGAAGATGGAATATGGTTACCATAAATGGGGTTTCAGTAAGATGA
1081  E E T S R D S G T Y E P E P I S W K N G N H V T I N G V S V R *

```

**Figure S1.** The nucleotide sequence and deduced amino acid sequence of *TcCTL15*. The amino acids and nucleotides were numbered at left. The black open box indicated the carbohydrate recognition domains (CRD) predicted by SMART and the highlight in yellow indicated the motifs with putative carbohydrate binding specificity.

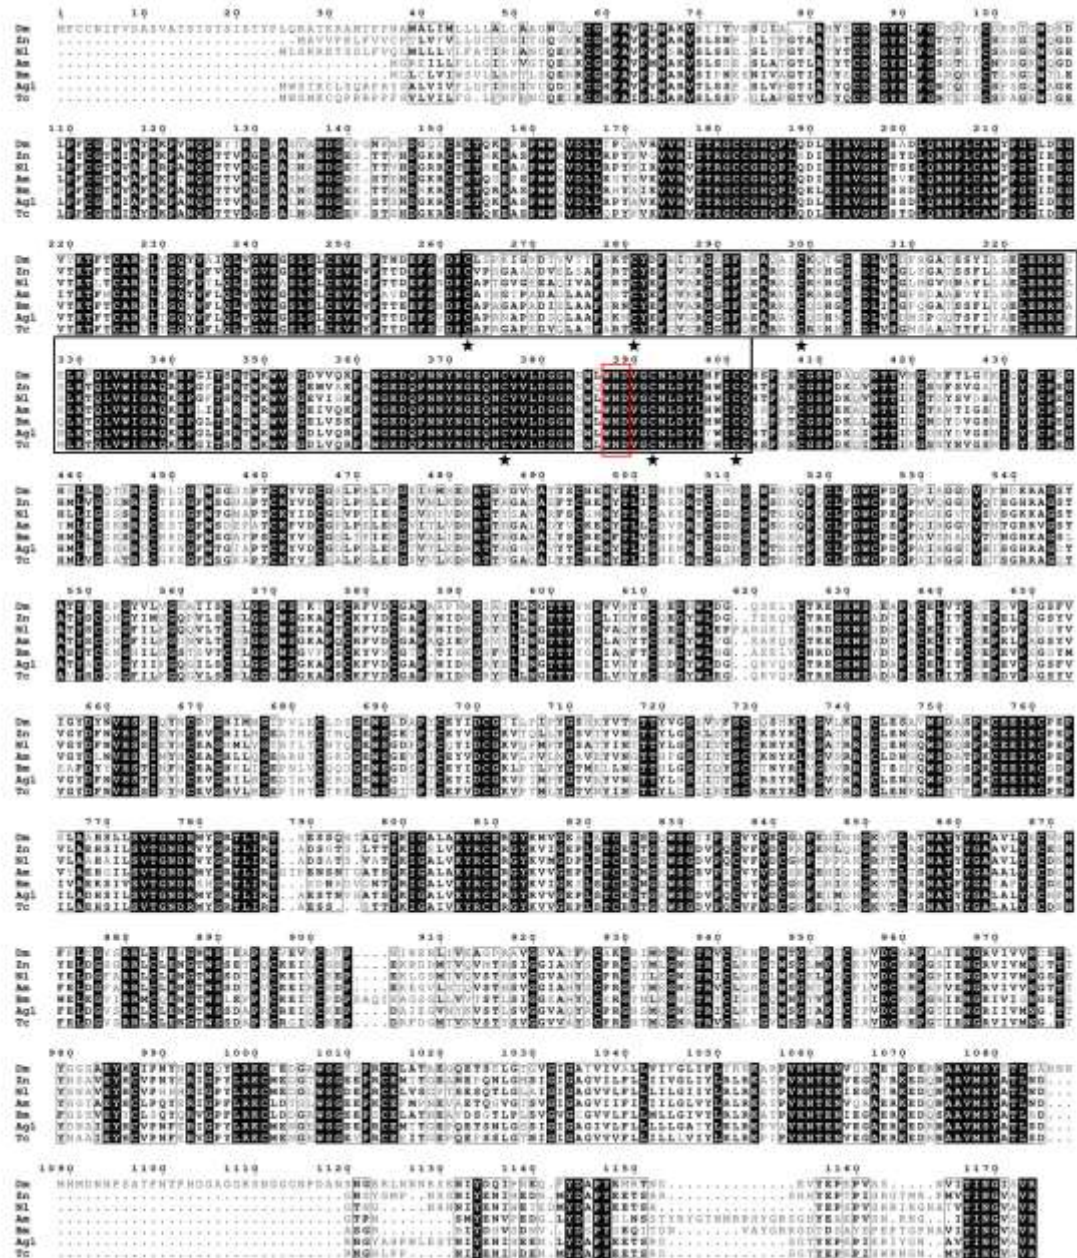

**Figure S2.** Multiple sequence alignment of TcCTL15 with homologues from other model insects. Dm: *Drosophila melanogaster*, Zn: *Zootermopsis nevadensis*, Nl: *Nilaparvata lugens*, Am: *Apis mellifera*, Bm: *Bombyx mori*, Agl: *Anoplophora glabripennis* and Tc: *Tribolium castaneum*. Amino acids involved carbohydrate recognition domains (CRDs) in sugar recognition were boxed with black. The WND motif was framed in red. Conserved cysteine is denoted by black asterisks. Highly similar amino acids were shaded in black background.

**Table S1 Oligonucleotide primers used in the current study.**

| Name                  | Purpose | Sequence (5'-3')                               |
|-----------------------|---------|------------------------------------------------|
| <i>TcCTL15</i> -F     | Clone   | atgggtcgcggatccgaattcTGC GCCCAGAGGGGGGCC       |
| <i>TcCTL15</i> -R     |         | gtgggtgggtgggtgctcgagTTGACAGATCCATGGTAGATAGTCG |
| ds- <i>TcCTL15</i> -F | RNAi    | taatacgactcactatagggAGTGCGATGAGGGATATGAGAC     |
| ds- <i>TcCTL15</i> -R |         | taatacgactcactatagggGTTAAAACTCGTGACAGGTGA      |
| ds- <i>TcVer</i> -F   |         | taatacgactcactatagggGTCTTGGTGGACCAAG           |
| ds- <i>TcVer</i> -R   |         | taatacgactcactatagggCCGCCATTTCTGTGATC          |
| <i>TcRPS3</i> -qF     |         | TCAAATTGATCGGAGGTTTG                           |
| <i>TcRPS3</i> -qR     |         | GTCCACGGCAACATAATCT                            |
| <i>TcCTL15</i> -qF    |         | AAGCCGATGCTGAAGACACA                           |
| <i>TcCTL15</i> -qR    |         | AATTTGTTTGTCGGGACTGCC                          |
| Dif1-qF               |         | GCCCGATGAGAGCATCAACAT                          |
| Dif1-qR               |         | CTTGTTGGGGTTGTTGTTGGAT                         |
| Dif2-qF               |         | CAAGTCACGCAATGTCTCTAGA                         |
| Dif2-qR               |         | ATCGGTTTCGAGTTTCGATTTGGT                       |
| Rel-qF                |         | GAGCCTGTGCAGATTGATATG                          |
| Rel-qR                |         | CTGGGGCAACATCGGTAAACA                          |
| STAT-qF               |         | TTCGTACGTGAGGCAGTGTC                           |
| STAT-qR               |         | TTCGTCTCAAATCGTCGGCA                           |
| att1-qF               |         | GCCAACTGGGATACTCCCATA                          |
| att1-qR               |         | TACCATTCTCCATAAAATCCCA                         |
| att2-qF               |         | TCGTAATTTTGCACCTCGCC                           |
| att2-qR               |         | TGGGGCATCTTTATTGACGAA                          |
| att3-qF               |         | TTTCCCAACTCTGGCGTCC                            |
| att3-qR               |         | TGCCATTGGGTCATTATTGAG                          |
| def1-qF               |         | CACAGCCTTTCCAGCAGATG                           |
| def1-qR               |         | CAAATAGAGACAATGAGCGGCA                         |
| def2-qF               |         | GCTACTCATTGTGCTCTAGTT                          |
| def2-qR               |         | AAAGAGGCAATGGGTCGCAC                           |
| def3-qF               |         | TGTTTGCAATCACTGCTTACCC                         |
| def3-qR               |         | TGTTGCAATAGCCTCCACGTT                          |
| col1-qF               | qRT-PCR | TTGCCAGCCGAAGAGTACAA                           |
| col1-qR               |         | GTCTTTCTCGGTGGAGTTCA                           |
| cecr2-qF              |         | TCCTGTAGTAAAAGACGGAGT                          |
| cecr2-qR              |         | CAGTATCCATAGTTGTGTACG                          |
| cecr3-qF              |         | TGTTCCCGTGGTTAAAAATGG                          |
| cecr3-qR              |         | ATACTGAATTGGGATTCTCC                           |
| Vg-qF                 |         | ATGAGTTGTTCTGAAGTTATGTA                        |
| Vg-qR                 |         | AACTGGGCTGCGAGAGAGA                            |
| FOXO-qF               |         | TCAGACCTCGAGCTTCCTCA                           |
| FOXO-qR               |         | TGCAAGCTGATCGGTGAAT                            |
| JHAMT-qF              |         | CATCTCGCCCTATCACCATTCTG                        |
| JHAMT-qR              |         | CCGCTGAAACCGATTGTGACAA                         |
| FDH-qF                |         | TCCTGGTGAACAATGCTGGG                           |
| FDH-qR                |         | TTGTGGCAACACACAGGGAA                           |
| spook-qF              |         | ATGTTTCAGTTTCGTGGTTTATAGC                      |
| spook-qR              |         | TGTGATTACAGCCGCAATCTTAC                        |
| shadow-qF             |         | TAAGAGCCCGCAAATCCAG                            |
| shadow-qR             |         | CGTCACGCCCGCTTGTAT                             |
| shade-qF              |         | TACTTCGGCTTCCCCTTCTG                           |
| shade-qR              |         | GTGAATCCCCGCAGATATGAA                          |
| E74-qF                |         | CTACCTTCTCCAGCAGCACCAC                         |
| E74-qR                |         | AGTGGCCGCCTGGATCA                              |
| Ftz-F1-qF             |         | TAGACAAAACGCAAAGGAAAAGG                        |
| Ftz-F1-qR             |         | GTTTGTACATCGGACCGAATTT                         |
| Br-C-qF               |         | CACAACACTTCTGTCTGCGGTG                         |
| Br-C-qR               |         | CACAACACTTCTGTCTGCGGTG                         |

---

|            |                         |
|------------|-------------------------|
| CCAPR1-qF  | ATGACACTAGTTTCGCTCTC    |
| CCAPR1-qR  | TGAGTGGTGCTAAACTTTGG    |
| CCAPR2-qF  | TTCTACAAGACCGAGCAGTTCAC |
| CCAPR2-qR  | CAAGCCACCGTTATCCTCCA    |
| Rickets-qF | TTTACCGTGCCAGGACCTG     |
| Rickets-qR | CAGAATCGCGTACAAGAACG    |

---
